# Supplementary material
Source: publisher figshare collection journal article supplement (https://wiley.figshare.com/ndownloader/files/12543050)
Supplement: Supplementary file 1 [file 12543050]

## Sheet: Sheet1
			All volumetric measurements are in mm3
ID	Group	Sex	Left Hippocampus	Right Hippocampus	Absolute difference in hippocampus volume between hemispheres	Mean hippocampus volume	Left telencephalon	Right telencephalon	Absolute difference in telencephalon volume between hemispheres	Mean telencephalon volume	Mean telencephalon volume - mean hippocampus volume	CrownRumpLength (cm)
AK15-312	100EHTBB	F	3.49683	3.18815	0.308677	3.34249	108.155	114.695	6.53903	111.425	108.083	6.5
AK15-538	100EHTBB	F	2.44437	2.39805	0.0463244	2.42121	85.5671	88.6457	3.07866	87.1064	84.6852	5.7
AK15-309	100EHTBB	M	3.38193	2.76628	0.61565	3.07411	120.136	121.987	1.85156	121.062	117.988	5.9
AK15-428	100EHTBB	M	2.81003	3.21746	0.407436	3.01374	99.5921	101.264	1.67159	100.428	97.4141	5.8
AK15-429	100EHTBB	M	2.57974	2.57007	0.00967026	2.5749	102.818	107.144	4.32532	104.981	102.406	5.6
AK15-618	100EHTBB	M	2.59116	2.79879	0.207635	2.69497	104.943	115.052	10.1098	109.997	107.303	6
AK15-327	10EHTBB	F	3.74903	2.90741	0.84162	3.32822	116.872	111.634	5.23793	114.253	110.925	6.3
AK15-438	10EHTBB	F	2.41279	2.95485	0.542065	2.68382	100.121	103.704	3.58282	101.913	99.2287	6.1
AK15-523	10EHTBB	F	3.05394	2.63951	0.414432	2.84672	112.384	112.121	0.263467	112.253	109.406	6
AK15-629	10EHTBB	F	3.09262	2.9834	0.109221	3.03801	114.786	118.883	4.09663	116.835	113.797	5.7
AK15-324	10EHTBB	M	2.4152	2.17284	0.242365	2.29402	97.6978	98.9672	1.26936	98.3325	96.0385	5.8
AK15-406	10EHTBB	M	2.44757	2.42775	0.0198171	2.43766	103.423	100.279	3.14451	101.851	99.4135	5.4
AK15-527	10EHTBB	M	2.84318	2.32263	0.520552	2.5829	103.033	99.7647	3.26806	101.399	98.8159	5.4
AK15-602	10EHTBB	M	3.09693	2.84706	0.249875	2.97199	112.602	119.965	7.36266	116.283	113.311	5.8
AK15-302	50EHTBB	F	2.99257	2.84543	0.147141	2.919	112.279	122.501	10.2222	117.39	114.471	5.8
AK15-329	50EHTBB	F	1.87731	2.41825	0.540935	2.14778	99.7833	99.6841	0.0992082	99.7337	97.5859	6
AK15-512	50EHTBB	F	3.47	2.87946	0.590541	3.17473	111.268	115.881	4.61363	113.575	110.4	6.1
AK15-537	50EHTBB	F	3.17288	2.99001	0.182871	3.08144	103.707	98.7148	4.99238	101.211	98.1296	5.7
AK15-340	50EHTBB	M	2.27462	2.23287	0.0417567	2.25374	104.485	99.9259	4.55962	102.206	99.9519	6.2
AK15-610	50EHTBB	M	2.72085	2.60834	0.112503	2.6646	106.047	111.032	4.98537	108.54	105.875	5.8
AK15-628	50EHTBB	M	2.34221	2.55112	0.208903	2.44667	99.6587	98.7153	0.943336	99.187	96.7403	6.1
AK15-326	Control	F	3.66625	3.25151	0.414742	3.45888	121.779	121.532	0.246711	121.655	118.196	6
AK15-415	Control	F	3.26092	3.41637	0.155452	3.33865	115.698	120.047	4.34938	117.873	114.534	6.5
AK15-502	Control	F	2.648	2.90641	0.258402	2.7772	111.562	103.509	8.0526	107.536	104.759	6.3
AK15-601	Control	F	3.0236	2.97123	0.0523753	2.99742	104.912	108.053	3.14016	106.482	103.485	5.9
AK15-317	Control	M	3.07615	2.91904	0.157109	2.9976	107.578	113.715	6.13633	110.647	107.649	5.6
AK15-516	Control	M	2.40466	2.32721	0.0774516	2.36593	102.322	99.0602	3.26159	100.691	98.325	5.8
AK15-519	Control	M	2.88918	3.1395	0.250322	3.01434	122.689	120.958	1.73167	121.824	118.809	6.1
AK15-611	Control	M	2.35736	2.37657	0.0192137	2.36696	109.608	117.47	7.86203	113.539	111.172	5.8
AK15-407	100TBPH	F	3.0667	3.22627	0.159575	3.14648	105.847	104.115	1.73243	104.981	101.835	5.9
AK15-543	100TBPH	F	3.66691	3.48687	0.180047	3.57689	110.023	117.264	7.24066	113.643	110.066	5.8
AK15-626	100TBPH	F	2.38389	2.41044	0.0265553	2.39717	89.4555	88.2833	1.17216	88.8694	86.4722	5.8
AK15-332	100TBPH	F	3.58972	3.18999	0.399731	3.38986	109.637	109.703	0.0661318	109.67	106.28	5.7
AK15-320	100TBPH	M	2.99715	2.8767	0.120442	2.93693	111.247	108.638	2.60978	109.942	107.006	5.8
AK15-408	100TBPH	M	2.29873	2.19448	0.104247	2.2466	97.1672	99.4778	2.31064	98.3225	96.0759	5.9
AK15-425	100TBPH	M	2.61994	2.80775	0.187815	2.71385	104.894	104.823	0.0713292	104.859	102.145	5.7
AK15-604	100TBPH	M	2.6697	2.68784	0.0181411	2.67877	104.607	113.692	9.08576	109.149	106.471	6
AK15-409	50TBPH	F	2.08879	2.70398	0.615188	2.39638	96.5799	106.238	9.6579	101.409	99.0125	5.5
AK15-619	50TBPH	F	3.59993	3.31666	0.283271	3.4583	105.853	107.298	1.44511	106.575	103.117	5.7
AK15-307	50TBPH	M	2.46546	2.5241	0.0586399	2.49478	119.053	119.555	0.501996	119.304	116.809	5.8
AK15-402	50TBPH	M	2.48165	2.79017	0.308513	2.63591	109.045	107.65	1.39531	108.347	105.712	5.9
AK15-430	50TBPH	M	2.85623	2.83007	0.0261535	2.84315	113.688	126.478	12.7896	120.083	117.24	5.5
AK15-603	50TBPH	M	2.4569	2.30593	0.150964	2.38141	100.839	105.337	4.49788	105.337	102.956	5.8
AK15-435	10TBPH	F	2.88087	2.85505	0.0258223	2.86796	112.771	106.876	5.89522	109.824	106.956	6
AK15-533	10TBPH	F	2.51213	2.73925	0.227123	2.62569	108.203	110.967	2.76375	109.585	106.96	6.5
AK15-534	10TBPH	F	2.37283	2.54011	0.167276	2.45647	106.674	103.875	2.79886	105.274	102.818	5.6
AK15-608	10TBPH	F	2.5802	2.51323	0.0669781	2.54672	108.059	110.863	2.80354	109.461	106.914	6
AK15-426	10TBPH	M	2.55695	2.61372	0.0567633	2.58534	112.912	110.254	2.65746	111.583	108.998	6.2
AK15-427	10TBPH	M	2.64625	2.77746	0.131208	2.71185	97.7809	110.215	12.4339	103.998	101.286	5.9
AK15-431	10TBPH	M	3.04777	2.93593	0.111845	2.99185	109.355	115.139	5.7837	112.247	109.255	5.9
AK15-520	10TBPH	M	2.91701	2.72284	0.194174	2.81993	107.315	117.819	10.504	112.567	109.747	5.8
